# Supplementary material
Source: Research Square preprint supplement (doi:10.21203/rs.3.rs-9677378/v1)
Supplement: Supplementary file 1 [file 56e3523406439df4d115a8a8.docx]

# Supplementary material

The following supplementary tables provide additional technical detail supporting the main-text findings. Cross-references in the text use the labels Table S1, Table S2, and Table S3. Supplementary File S1 (coding_matrix_rubric.xlsx) provides the full 67-variable coding rubric with operational definitions, present/absent decision rules, and the complete coded data matrix for the 30-document corpus. Supplementary File S2 provides the bibliographic record of all 30 corpus documents.

**Table S1** Governance coverage by dimension across the 30-document corpus. Average coverage (%) is the mean share of corpus documents that address provisions within each dimension. Provisions absent from majority (%) is the share of individual provisions addressed by fewer than half the corpus documents. The Transparency dimension records the lowest coverage of all five dimensions

| **Governance dimension** | **No. of provisions** | **Average coverage (%)** | **Provisions absent from majority (%)** |
| --- | --- | --- | --- |
| Risk Assessment | 14 | 50.5 | 50.0 |
| Human Accountability | 13 | 53.8 | 46.2 |
| Technical Controls | 15 | 37.1 | 73.3 |
| Transparency | 12 | 34.4 | 75.0 |
| Enforcement | 13 | 37.2 | 61.5 |

**Table S2** Ten governance provisions least frequently addressed in the global corpus, ordered from lowest to highest estimated coverage. The final column shows the probability that each provision is addressed by fewer than one-quarter of global frameworks

| **Governance provision** | **Dimension** | **Documents addressing (%)** | **95% credible interval** | **Pr. addressed by <25%** |
| --- | --- | --- | --- | --- |
| Gap vs existing law identified | Enforcement | 3% | [0%, 11%] | 1.00 |
| Supervisory capacity requirements | Enforcement | 3% | [0%, 11%] | 1.00 |
| Penalty type specified | Enforcement | 3% | [0%, 11%] | 1.00 |
| Proposed legislative change | Enforcement | 3% | [0%, 11%] | 1.00 |
| Penalty / sanctions specified | Enforcement | 6% | [1%, 17%] | 1.00 |
| Cybersecurity requirements | Technical Controls | 16% | [5%, 30%] | 0.92 |
| Liquidity risk from AI | Risk Assessment | 19% | [7%, 34%] | 0.82 |
| Black-box problem addressed | Transparency | 19% | [7%, 34%] | 0.82 |
| Algorithmic auditing required | Transparency | 19% | [7%, 34%] | 0.82 |
| Licensing / authorisation required | Enforcement | 19% | [8%, 34%] | 0.82 |

**Table S3** Sensitivity of dimension-level coverage estimates to prior specification. Non-informative prior = Beta(1,1); weakly informative prior = Beta(2,2). The rank ordering of dimensions and identification of Transparency as the weakest dimension are unchanged across both specifications, confirming the robustness of the substantive findings

| **Dimension** | **Estimated coverage (Non-informative)** | **95% CI (Non-informative)** | **Estimated coverage (Weakly informative)** | **95% CI (Weakly informative)** |
| --- | --- | --- | --- | --- |
| Risk Assessment | 50% | [46%, 55%] | 50% | [46%, 55%] |
| Human Accountability | 54% | [49%, 59%] | 54% | [49%, 59%] |
| Technical Controls | 37% | [33%, 42%] | 37% | [33%, 42%] |
| Transparency | 35% | [30%, 40%] | 35% | [30%, 40%] |
| Enforcement | 37% | [33%, 42%] | 37% | [33%, 42%] |
